# Supplementary material for: Age and Primary Vaccination Background Influence the Plasma Cell Response to Pertussis Booster Vaccination
Source: MDPI journal article supplement (doi:10.3390/vaccines10020136), 2022-01-18
Supplement: s1 [file s1]

**Table S1.** Complete overview of the inclusion and exclusion criteria for this study. This table is adjusted from a previous manuscript describing the inclusion and exclusion criteria of the total BERT study cohort (Versteegen, P., et al., EBioMedicine, 2021)[1].

### Inclusion criteria

In order to be eligible to participate in this study, participants must meet all of the following criteria:

|                                                                                                                                                                                                                                                                                                                                                                                      |
|--------------------------------------------------------------------------------------------------------------------------------------------------------------------------------------------------------------------------------------------------------------------------------------------------------------------------------------------------------------------------------------|
| • normal general health;                                                                                                                                                                                                                                                                                                                                                             |
| • within the right age group for the cohort;                                                                                                                                                                                                                                                                                                                                         |
| • received all regular vaccines for their age group according to the Dutch NIP in the Netherlands; a copy of the vaccination booklet will be included in the participant's documents. If booklet is not available for cohorts A, B and C, vaccination status will be checked with regulatory agencies / GP. For cohort C and D this booklet might not be available due to their age; |
| • provision of written informed consent from the adult participants and parents or legal guardians of minors;                                                                                                                                                                                                                                                                        |
| • willing to adhere to the protocol and be available during the study period.                                                                                                                                                                                                                                                                                                        |

### Exclusion criteria

Participants meeting any of the following criteria are excluded from participation in this study:

|                                                                                                                                                                                                                                              |
|----------------------------------------------------------------------------------------------------------------------------------------------------------------------------------------------------------------------------------------------|
| • present evidence of serious disease(s) within the last 3 months before inclusion requiring immunosuppressive or immune modulating medical treatment, such as systemic corticosteroids, that might interfere with the results of the study; |
| • chronic infection;                                                                                                                                                                                                                         |
| • known or suspected immune deficiency;                                                                                                                                                                                                      |
| • history of any neurologic disorder, including epilepsy;                                                                                                                                                                                    |
| • previous administration of serum products (including immunoglobulins) within 6 months before vaccination and blood sampling;                                                                                                               |
| • known or suspected allergy to any of the vaccine components (by medical history);                                                                                                                                                          |
| • occurrence of serious adverse events (SAEs) after primary DTwP-IPV vaccination, DTaP-IPV vaccination or any other vaccination (by medical history);                                                                                        |
| • vaccination with any pertussis containing vaccine other than those described in the inclusion criteria (i.e. only according to NIP);                                                                                                       |
| • adult pertussis vaccination according to the NIP in the last 5 years (i.e. maternal vaccination);                                                                                                                                          |
| • vaccination with any other diphtheria, tetanus or polio containing vaccine in the last 5 years, other than described in the NIP;                                                                                                           |
| • children between 8 and 10 years of age eligible for cohort A who have already received the dT-IPV booster vaccination according to the Dutch NIP around 9 years of age;                                                                    |
| • mixed wP and aP priming within a participant;                                                                                                                                                                                              |
| • pregnancy.                                                                                                                                                                                                                                 |

1. Versteegen, P., et al., *Responses to an acellular pertussis booster vaccination in children, adolescents, and young and older adults: A collaborative study in Finland, the Netherlands, and the United Kingdom*. 2021. **65**: p. 103247.
