# Supplementary material for: Age and Primary Vaccination Background Influence the Plasma Cell Response to Pertussis Booster Vaccination
Source: MDPI journal article supplement (doi:10.3390/vaccines10020136), 2022-01-18
Supplement: s1 [file s1]

**Table S4.** Baseline distribution of leukocytes, lymphocytes, T cells and NK cells (cells/ $\mu$ L, median (min-max)) in donor groups.

| Cohort             |        | Children  |            |        | Adolescents     |            |        | Young adults                         |           |            | Older adults      |      |  |
|--------------------|--------|-----------|------------|--------|-----------------|------------|--------|--------------------------------------|-----------|------------|-------------------|------|--|
| age                |        | 7-10 y/o  |            |        | 11-15 y/o       |            |        | 20-34 y/o                            |           |            | 60-70 y/o         |      |  |
| priming background |        | aP        |            |        | mixed aP and wP |            |        | wP                                   |           |            | no data available |      |  |
| N=                 |        | 12        |            |        | 12              |            |        | 12                                   |           |            | 12                |      |  |
| Cohort data        | median | min.      | max.       | median | min.            | max.       | median | min.                                 | max.      | median     | min.              | max. |  |
| Leukocytes         | 5795   | 3397      | 14263      | 6148   | 3296            | 7837       | 5054   | 3224                                 | 6501      | 5234       | 3373              | 7547 |  |
| Lymphocytes        | 2551   | 2128      | 3902       | 2389   | 1077            | 3312       | 2017   | 1699                                 | 3057      | 2003       | 1150              | 3080 |  |
| T cells            | 1806   | 1132      | 3308       | 1674   | 814             | 2466       | 1481   | 1204                                 | 2405      | 1481       | 794               | 2312 |  |
| NK cells           | 210    | 123       | 508        | 268    | 65              | 456        | 214    | 115                                  | 713       | 282        | 87                | 547  |  |
| Reference values†  |        | Children  |            |        | Adolescents     |            |        | Young adults                         |           |            | Older adults      |      |  |
| age                |        | 5-10 y/o  |            |        | 10-16 y/o       |            |        | Adult cohort, no age range specified |           |            |                   |      |  |
| N=                 |        | 35        |            |        | 23              |            |        | 51                                   |           |            |                   |      |  |
| Reference data     | median | 5th Perc. | 95th perc. | median | 5th Perc.       | 95th perc. | median |                                      | 5th Perc. | 95th perc. |                   |      |  |
| Lymphocytes        | 2800   | 1100      | 5900       | 2200   | 1000            | 5300       | 1800   |                                      | 1000      | 2800       |                   |      |  |
| T cells            | 1900   | 700       | 4200       | 1500   | 800             | 3500       | 1200   |                                      | 700       | 2100       |                   |      |  |
| NK cells           | 300    | 90        | 900        | 300    | 70              | 1200       | 30     |                                      | 90        | 600        |                   |      |  |

†Source publication for the reference values: Comans-Bitter et al, Journal of Pediatrics, 1997, doi: 10.1016/s0022-3476(97)70200-2. When using the here-presented reference values, please refer to the source publication of this data.
