# Supplementary material for: Age and Primary Vaccination Background Influence the Plasma Cell Response to Pertussis Booster Vaccination
Source: Vaccines (Basel). 2022 Jan 18;10(2):136. doi: 10.3390/vaccines10020136 (PMC8878388; doi:10.3390/vaccines10020136)
Supplement: Supplementary file 1 [file vaccines-10-00136-s001.zip]

Archive with 7 entries (7 files):
- Supplemental Figures. Diks et al. B-cell kinetics after aP vaccination_proof prints.pdf
- Supplemental Table S1. Diks et al. B-cell kinetics after aP vaccination_proof prints.pdf
- Supplemental Table S2. Diks et al. B-cell kinetics after aP vaccination_proof prints.pdf
- Supplemental Table S3. Diks et al. B-cell kinetics after aP vaccination_proof prints.pdf
- Supplemental Table S4. Diks et al. B-cell kinetics after aP vaccination_proof prints.pdf
- Supplemental Table S5. Diks et al. B-cell kinetics after aP vaccination_proof prints.xlsx
- Supplemental Table S6. Diks et al. B-cell kinetics after aP vaccination_proof prints.xlsx
