# Supplementary material for: Age and Primary Vaccination Background Influence the Plasma Cell Response to Pertussis Booster Vaccination
Source: Vaccines (Basel). 2022 Jan 18;10(2):136. doi: 10.3390/vaccines10020136 (PMC8878388; doi:10.3390/vaccines10020136)
Supplement: Supplementary file 1 [file vaccines-10-00136-s001.zip › Supplemental Table S5. Diks et al. B-cell kinetics after aP vaccination_proof prints.xlsx]

## Sheet: Supplemental Table 5
			PT-specific IgG
			D0 (IU/mL)		D28 (IU/mL)		D365 (IU/mL)		ratio D28/D0		ratio D365/D0
			Spearman r	p	Spearman r	p	Spearman r	p	Spearman r	p	Spearman r	p
IgG1+ PCs	Total	D7-0	ns	ns	ns	ns	ns	ns	ns	ns	ns	ns
		ratio D7	ns	ns	0.3224	0.0289	0.3809	0.009	ns	ns	ns	ns
	MS1	D7-0	ns	ns	ns	ns	ns	ns	ns	ns	ns	ns
		ratio D7	ns	ns	ns	ns	ns	ns	ns	ns	ns	ns
	MS2	D7-0	ns	ns	ns	ns	ns	ns	ns	ns	ns	ns
		ratio D7	ns	ns	0.3895	0.0075	0.3884	0.0077	ns	ns	ns	ns
	MS3	D7-0	ns	ns	ns	ns	ns	ns	ns	ns	ns	ns
		ratio D7	ns	ns	ns	ns	0.3043	0.0446	ns	ns	ns	ns
IgG1+ MBCS		ratio D14/28	ns	ns	ns	ns	ns	ns	ns	ns	ns	ns
			Prn-specific IgG
			D0 (IU/mL)		D28 (IU/mL)		D365 (IU/mL)		ratio D28/D0		ratio D365/D0
			Spearman r	p	Spearman r	p	Spearman r	p	Spearman r	p	Spearman r	p
IgG1+ PCs	Total	D7-0	ns	ns	ns	ns	ns	ns	ns	ns	ns	ns
		ratio D7	ns	ns	ns	ns	ns	ns	0.4347	0.0025	0.4628	0.0012
	MS1	D7-0	ns	ns	ns	ns	ns	ns	ns	ns	ns	ns
		ratio D7	ns	ns	ns	ns	ns	ns	ns	ns	ns	ns
	MS2	D7-0	ns	ns	ns	ns	ns	ns	ns	ns	ns	ns
		ratio D7	ns	ns	ns	ns	ns	ns	0.4384	0.0023	0.4277	0.003
	MS3	D7-0	ns	ns	ns	ns	ns	ns	ns	ns	ns	ns
		ratio D7	ns	ns	ns	ns	ns	ns	ns	ns	0.3718	0.013
IgG1+ MBCS		ratio D14/28	ns	ns	ns	ns	ns	ns	ns	ns	ns	ns
			FHA-specific IgG
			D0 (IU/mL)		D28 (IU/mL)		D365 (IU/mL)		ratio D28/D0		ratio D365/D0
			Spearman r	p	Spearman r	p	Spearman r	p	Spearman r	p	Spearman r	p
IgG1+ PCs	Total	D7-0	ns	ns	ns	ns	ns	ns	ns	ns	ns	ns
		ratio D7	ns	ns	ns	ns	0.3589	0.0143	ns	ns	ns	ns
	MS1	D7-0	ns	ns	ns	ns	ns	ns	ns	ns	ns	ns
		ratio D7	-0.3379	0.033	ns	ns	ns	ns	0.3276	0.0391	0.3664	0.02
	MS2	D7-0	ns	ns	0.2948	0.0442	ns	ns	ns	ns	ns	ns
		ratio D7	ns	ns	0.2911	0.0497	0.3527	0.0162	ns	ns	0.2929	0.0482
	MS3	D7-0	ns	ns	ns	ns	ns	ns	ns	ns	ns	ns
		ratio D7	ns	ns	ns	ns	ns	ns	ns	ns	ns	ns
IgG1+ MBCS		ratio D14/28	ns	ns	ns	ns	ns	ns	ns	ns	ns	ns
