# Supplementary material for: Age and Primary Vaccination Background Influence the Plasma Cell Response to Pertussis Booster Vaccination
Source: Vaccines (Basel). 2022 Jan 18;10(2):136. doi: 10.3390/vaccines10020136 (PMC8878388; doi:10.3390/vaccines10020136)
Supplement: Supplementary file 1 [file vaccines-10-00136-s001.zip › Supplemental Table S6. Diks et al. B-cell kinetics after aP vaccination_proof prints.xlsx]

## Sheet: Supplemental Table 6
			PT-specific IgA
			D0 (IU/mL)		D28 (IU/mL)		D365 (IU/mL)		ratio D28/D0		ratio D365/D0
			Spearman r	p	Spearman r	p	Spearman r	p	Spearman r	p	Spearman r	p
IgA1+ PCs	Total	D7-0	ns	ns	0.3251	0.0275	ns	ns	ns	ns	ns	ns
		ratio D7	ns	ns	0.4047	0.0053	0.3691	0.0116	ns	ns	ns	ns
	MS1	D7-0	ns	ns	ns	ns	ns	ns	-0.327	0.0265	ns	ns
		ratio D7	ns	ns	-0.3111	0.0353	ns	ns	ns	ns	ns	ns
	MS2	D7-0	ns	ns	ns	ns	ns	ns	ns	ns	ns	ns
		ratio D7	ns	ns	0.3384	0.0214	ns	ns	ns	ns	ns	ns
	MS3	D7-0	ns	ns	0.3473	0.018	ns	ns	ns	ns	ns	ns
		ratio D7	ns	ns	0.4466	0.0027	ns	ns	0.3842	0.011	ns	ns
IgA1+ MBCS		ratio D14/28	ns	ns	ns	ns	ns	ns	ns	ns	ns	ns
IgA2+ MBCs		ratio D14/28	ns	ns	ns	ns	ns	ns	ns	ns	ns	ns
			Prn-specific IgA
			D0 (IU/mL)		D28 (IU/mL)		D365 (IU/mL)		ratio D28/D0		ratio D365/D0
			Spearman r	p	Spearman r	p	Spearman r	p	Spearman r	p	Spearman r	p
IgA1+ PCs	Total	D7-0	ns	ns	0.3328	0.0238	ns	ns	ns	ns	ns	ns
		ratio D7	ns	ns	0.3451	0.0189	0.3702	0.0113	ns	ns	0.3295	0.0253
	MS1	D7-0	ns	ns	ns	ns	ns	ns	ns	ns	ns	ns
		ratio D7	ns	ns	ns	ns	ns	ns	ns	ns	ns	ns
	MS2	D7-0	ns	ns	ns	ns	ns	ns	ns	ns	ns	ns
		ratio D7	ns	ns	0.3364	0.0223	0.3037	0.0402	ns	ns	ns	ns
	MS3	D7-0	ns	ns	0.3203	0.03	ns	ns	0.3055	0.039	ns	ns
		ratio D7	ns	ns	0.434	0.0036	0.3792	0.0121	0.3844	0.0109	0.3309	0.0302
IgA1+ MBCS		ratio D14/28	ns	ns	ns	ns	ns	ns	ns	ns	ns	ns
IgA2+ MBCs		ratio D14/28	0.3688	0.0117	ns	ns	ns	ns	ns	ns	ns	ns
			FHA-specific IgA
			D0 (IU/mL)		D28 (IU/mL)		D365 (IU/mL)		ratio D28/D0		ratio D365/D0
			Spearman r	p	Spearman r	p	Spearman r	p	Spearman r	p	Spearman r	p
IgA1+ PCs	Total	D7-0	ns	ns	0.5327	0.0001	0.4398	0.0022	0.3488	0.0175	0.3722	0.0109
		ratio D7	ns	ns	0.4831	0.0007	0.3845	0.0083	0.3728	0.0107	0.3665	0.0122
	MS1	D7-0	ns	ns	ns	ns	ns	ns	ns	ns	ns	ns
		ratio D7	ns	ns	ns	ns	ns	ns	ns	ns	ns	ns
	MS2	D7-0	ns	ns	0.4524	0.0016	0.378	0.0096	0.3154	0.0327	0.3162	0.0323
		ratio D7	ns	ns	0.4424	0.0021	0.3621	0.0134	0.3885	0.0076	0.4069	0.005
	MS3	D7-0	ns	ns	0.4328	0.0027	0.3375	0.0218	ns	ns	0.3191	0.0306
		ratio D7	ns	ns	0.5749	<0,0001	0.4787	0.0012	ns	ns	0.3947	0.0088
IgA1+ MBCS		ratio D14/28	ns	ns	ns	ns	ns	ns	0.3166	0.032	0.3783	0.0095
IgA2+ MBCs		ratio D14/28	ns	ns	ns	ns	ns	ns	ns	ns	ns	ns
